# Supplementary material for: Identifying endoplasmic reticulum stress-related molecular subtypes and prognostic model for predicting the immune landscape and therapy response in pancreatic cancer
Source: Aging (Albany NY). 2023 Oct 9;15(19):10549–79. doi: 10.18632/aging.205094 (PMC10599750; doi:10.18632/aging.205094)
Supplement: Supplementary Table 2 [file aging-15-205094-s003.xls]

## Sheet: Sheet1
Supplementary Table 2. After 348 duplicate genes were removed, 312 endoplasmic reticulum stress-related genes remained.
BCL2L11
CREB3
CEBPB
HYOU1
ERN2
SERINC3
ERP29
PARK7
LRRK2
RNF183
DAB2IP
DDIT3
ERN1
SIRT1
PPP1R15A
BBC3
GRINA
ERO1A
APAF1
HSPA1A
PDX1
ITPR1
MAGEA3
MAP3K5
ATF4
NCK1
ATP2A1
ATP2A3
OPA1
PRKN
TXNDC12
PMAIP1
PML
DNAJC10
RNF186
QRICH1
SELENOS
PTPN1
PTPN2
TRIB3
BAK1
BAX
SELENOK
BCL2
BCL2L1
BOK
TMBIM6
TP53
TRAF2
WFS1
XBP1
CHAC1
BAG6
CASP4
TMEM117
NCK2
SYVN1
TNFRSF10B
BRSK2
CREB3L1
AIFM1
EIF2AK3
HERPUD1
TMED2
DNAJC3
PPP1R15B
NR1H3
LPCAT3
ABCA7
RACK1
CLU
ATF6B
UFL1
ALOX5
SVIP
AQP11
USP25
HSPA5
MIR199A1
DNAJB9
UBXN1
BFAR
SGTA
DDRGK1
NR1H2
USP14
BCAP31
AGR2
FCGR2B
ATF6
UBQLN2
UBQLN1
ATXN3
NFE2L2
RNFT1
PIK3R1
TMEM33
RNFT2
CAV1
USP13
TMEM259
RNF185
ATF3
MBTPS2
CREB3L3
DDX3X
EIF4G1
PIGBOS1
USP19
COPS5
FICD
NUPR1
MANF
EIF2AK4
SESN2
CERT1
PDIA6
TRIM13
FLOT1
STUB1
UBE4B
MARCHF6
CLGN
ERLIN1
CFTR
SEC61B
OS9
FAF1
ERLIN2
RNF139
MAN1B1
FBXO17
NIBAN1
UBE2J2
ERP27
CALR3
FBXO27
UBXN10
CREB3L4
CTH
TTC23L
TMTC3
BHLHA15
TOR1A
SCAMP5
EIF2S1
ELAVL4
STT3B
DNAJC18
EP300
ERP44
UBXN4
FAF2
ECPAS
SDF2L1
ALOX15
ABL1
ANKS4B
GORASP2
FBXO2
FBXO6
FGF21
TBL2
AMFR
SERP1
ERLEC1
RNF175
PDIA3
GSK3B
NRBF2
DNAJB2
UBAC2
NCCRP1
CXCL8
JUN
NHLRC1
SERP2
MIR200C
MARCKS
MAN1A1
ATP2A2
P4HB
DERL2
FAM8A1
UBE2J1
UFC1
JKAMP
UFM1
GET4
PIK3R2
TMCO1
SGTB
DNAJB12
PARP16
AUP1
ANKZF1
PPP2CB
RNF121
YOD1
NPLOC4
EDEM2
UGGT2
NGLY1
EIF2AK2
UGGT1
CCDC47
PSMC6
RCN3
RHBDD2
CREBZF
RASGRF1
RASGRF2
CCND1
RNF5
SEL1L
HERPUD2
PDIA2
CREB3L2
THBS1
THBS4
HSP90B1
UBE2G2
UFD1
UMOD
VCP
TRIM25
RNF103
TMUB2
DERL1
UBA5
UBXN8
ERMP1
DNAJB14
FOXRED2
EDEM3
CDK5RAP3
SEL1L2
UBXN6
CALR
HM13
TMX1
CANX
TMUB1
ATG10
PLA2G6
SRPX
RHBDD1
TMTC4
STC2
MBTPS1
EIF2B5
TMEM67
DERL3
VAPB
TMEM129
UBE4A
FBXO44
PDIA4
EDEM1
SEC16A
NFYA
NFYC
ASNS
EXOSC7
EXOSC5
DIS3
KHSRP
EXOSC3
CCL2
EXOSC8
NFYB
EXOSC9
EXOSC2
PARN
IGFBP1
CEBPG
EXOSC1
DCP2
EXOSC4
EXOSC6
PPP1R1C
PPP1R13B
PPP1R16B
PPP1R14B
EIF2AK1
PPP1R12A
PPP1R12B
PPP1R12C
PPP1R14D
PPP1CA
PPP1CB
PPP1CC
PPP1R1A
PPP1R2
PPP1R3A
PPP1R3C
PPP1R3D
PPP1R7
PPP1R8
PPP1R10
PPP1R9A
MAPK8
PPP1R3G
PPP1R11
PPP1R3B
PPP1R14C
PPP1R1B
MAP1LC3A
PPP1R16A
PPP1R3F
PPP1R3E
PPP1R14A
